# Supplementary material for: A Combination of Ruthenium Complexes and Photosensitizers to Treat Colorectal Cancer
Source: MDPI journal article supplement (doi:10.3390/inorganics11120451), 2023-11-22
Supplement: s1 [file s1]

Archive with 2 entries (2 files):
- Figure S1.pdf
- Figure S1.tiff
