# Supplementary material for: A Combination of Ruthenium Complexes and Photosensitizers to Treat Colorectal Cancer
Source: MDPI journal article supplement (doi:10.3390/inorganics11120451), 2023-11-22
Supplement: s1 [file s1 › Figure S1.pdf]

Article

# A Combination of Ruthenium Complexes and Photosensitizers to Treat Colorectal Cancer

Jacquie Massoud <sup>1</sup>, Aline Pinon <sup>1</sup>, Manuel Gallardo-Villagrán <sup>1,2</sup>, Lucie Paulus <sup>1</sup>, Catherine Ouk <sup>3</sup>, Claire Carrion <sup>3</sup>, Sayed Antoun <sup>4</sup>, Mona Diab-Assaf <sup>5</sup>, Bruno Therrien <sup>2,\*</sup> and Bertrand Liagre <sup>1,\*</sup>

**Citation:** To be added by editorial staff during production.

Academic Editor: Firstname  
Lastname

Received: date  
Revised: date  
Accepted: date  
Published: date

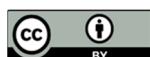

**Copyright:** © 2023 by the authors.  
Submitted for possible open access  
publication under the terms and  
conditions of the Creative Commons  
Attribution (CC BY) license

## Supporting information

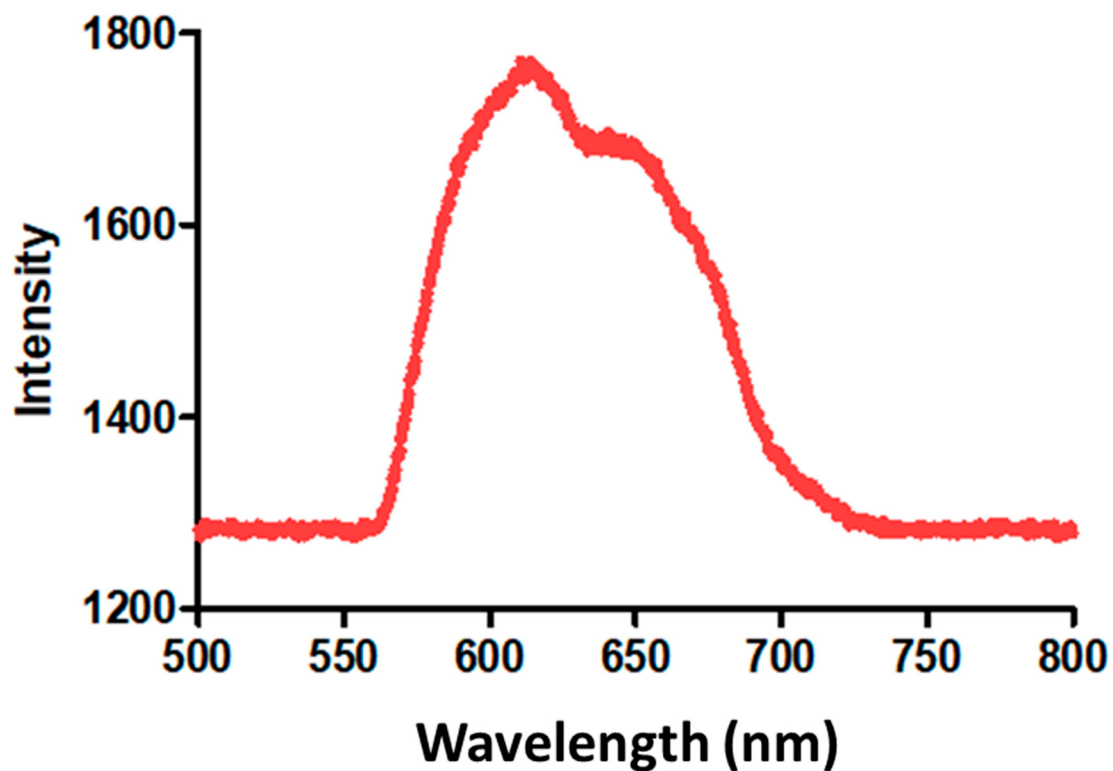

**Figure S1.** Emission spectrum of the used light source (a 630-660 nm CURElight lamp (PhotoCure ASA, Oslo, Norway)).
