# Supplementary figures and images for: A Combination of Ruthenium Complexes and Photosensitizers to Treat Colorectal Cancer
Source: MDPI journal article supplement (doi:10.3390/inorganics11120451), 2023-11-22

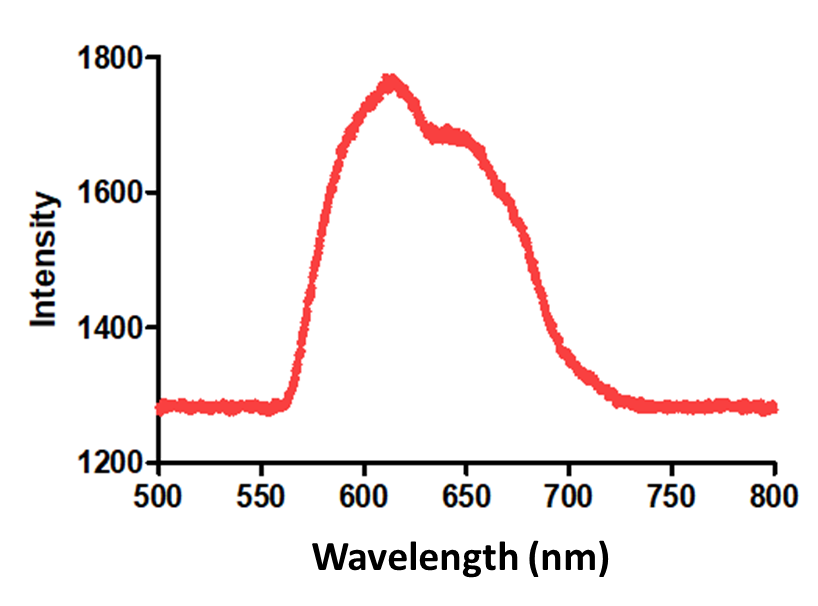

Supplement: s1 [file s1 › Figure S1.tiff]
